# Supplementary material
Source: PubMed Central journal article supplement (PMC1994618)
Supplement: JCI0731935sd.pdf [file JCI0731935sd.pdf]

Gelderman Supplemental Fig 1

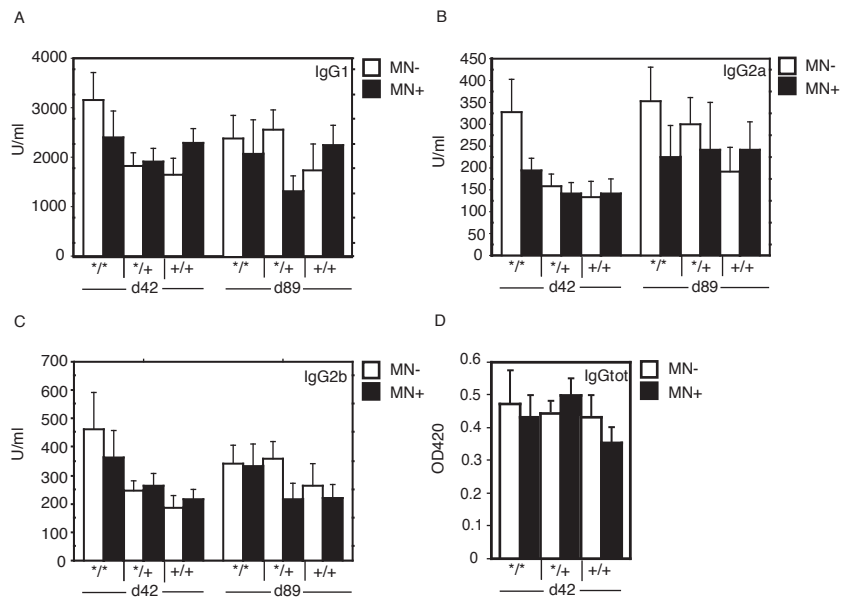

A

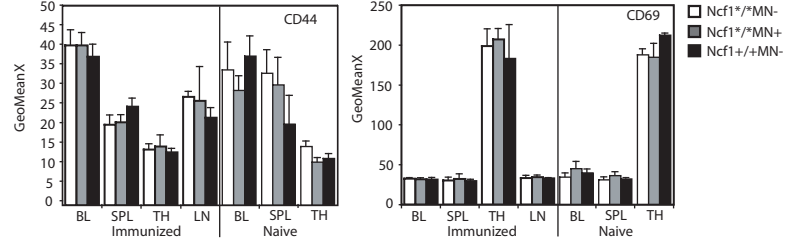

B

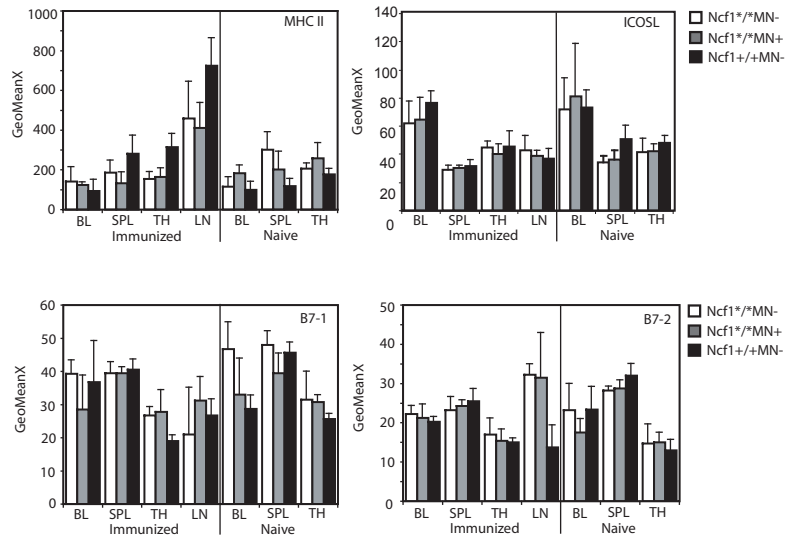

### **Suppl Figure 1**

(A-C) Serum from mice immunized with CII was analyzed for the presence of anti-CII Ab as in Figure 3, 42 or 89 days after immunization. Different isotypes were measured (IgG1, IgG2a and IgG2b). A pool of serum from immunized DBA/1 mice was used as a standard. (D) Total IgG levels in these mice did not differ. Means and SEM are shown of similar groups as in Figure 3.

### **Suppl Figure 2**

(A) Expression levels of CD44 and CD69 on CD3<sup>+</sup>CD4<sup>+</sup> cells did not differ between the genotypes in naïve nor in immunized mice. (B) Expression levels of MHC Class II and costimulatory molecules ICOSL (CD275), B7-1 (CD80) and B7-2 (CD86) on macrophages (F4/80<sup>+</sup>CD11c<sup>-</sup>) did not differ between the genotypes either. Mean and SEM are shown of four mice per group. BL: blood, SPL: spleen, TH: thymus, LN: inguinal lymph nodes.
